# Supplementary material for: Chronic viral coinfections differentially affect the likelihood of developing long COVID
Source: PubMed Central journal article supplement (PMC9888380; doi:10.1172/jci163669), 2023-02-01
Supplement: jci-133-163669-s021.pdf [file jci-133-163669-s021.pdf]

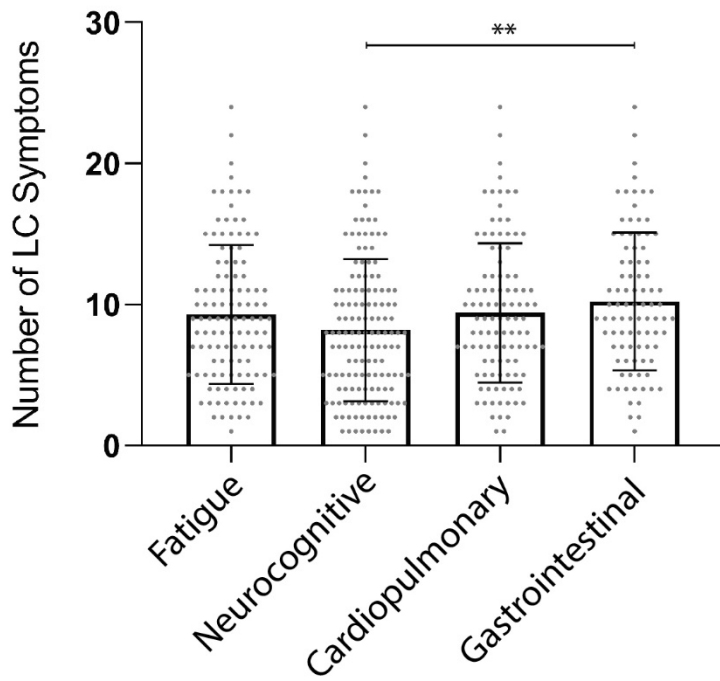

**Supplemental Figure 1.** Number of Long COVID (LC) symptoms at the time of sample collection (median 4 months following SARS-CoV-2 PCR diagnosis) by LC symptom phenotype. Bars and lines represent mean and standard deviation. \*\* P < 0.01 as determined by Kruskal-Wallis test with Dunn correction for multiple comparisons. Each point represents a study participant.

**Supplemental Table 1.** Subgroup analysis of plasma EBV DNA testing and other factors in subgroups of randomly selected participants stratified by Early Antigen-Diffuse (EA-D) IgG positivity.

|                                                                                                  | EA-D IgG Negative  | EA-D IgG Positive |
|--------------------------------------------------------------------------------------------------|--------------------|-------------------|
| N                                                                                                | 25                 | 25                |
| Plasma EBV DNA Positive [n (%)]                                                                  | 1 (4) <sup>a</sup> | 0 (0)             |
| Timing in days of data collection following acute COVID symptom onset [median (QR)] <sup>b</sup> | 126 (120, 144)     | 121 (101, 128)    |
| Age [Median (QR)]                                                                                | 42 (32, 55)        | 49 (37, 61)       |
| Male Sex                                                                                         | 18 (72)            | 12 (48)           |
| BMI >30                                                                                          | 15 (60)            | 17 (68)           |
| Pre-existing Health Conditions                                                                   |                    |                   |
| HIV                                                                                              | 3 (12)             | 5 (20)            |
| Autoimmune Disease                                                                               | 0 (0)              | 3 (12)            |
| Diabetes                                                                                         | 1 (4)              | 2 (8)             |
| Heart Disease                                                                                    | 0 (0)              | 1 (4)             |
| Hypertension                                                                                     | 1 (4)              | 6 (24)            |
| Lung Disease                                                                                     | 5 (20)             | 7 (28)            |
| Hospitalized                                                                                     | 3 (12)             | 4 (16)            |
| LC All                                                                                           | 18 (72)            | 18 (72)           |
| LC >5 Symptoms                                                                                   | 9 (36)             | 9 (36)            |
| Fatigue                                                                                          | 10 (40)            | 13 (52)           |
| Cardiopulmonary Symptoms                                                                         | 9 (36)             | 10 (40)           |
| Gastrointestinal Symptoms                                                                        | 10 (40)            | 9 (36)            |
| Neurocognitive Symptoms                                                                          | 13 (52)            | 15 (60)           |

BMI = body mass index; EBV = Epstein Barr Virus; Ag = antigen; LC = post-acute sequelae of SARS-CoV-2 infection

<sup>a</sup> One participant with one Long COVID symptom had detectable DNA below the limit of quantitation (<390 copies/mL)

<sup>b</sup> QR = 25%, 75% quartiles)

**Supplementary Table 2.** Relationship between HIV and EBV and CMV serological results in participants included in logistic regression models.

|                 | HIV- (N=221)            | HIV+ (N=52)  | All Participants (N=273) |
|-----------------|-------------------------|--------------|--------------------------|
| EBV EA-D IgG+   | 71 (32.1%)              | 27 (51.9%)** | 98 (35.9%)               |
| EBNA IgG>600 IU | 87 (39.4%)              | 23 (44.2%)   | 110 (40.3%)              |
| CMV IgG+        | 98 (44.5%) <sup>a</sup> | 51 (98.1%)** | 149 (54.8%)              |

<sup>a</sup> N=220 (1 HIV- participant did not have CMV IgG results)

\*\* P <0.01 by two-tailed Chi Square Testing

**Supplemental Table 3.** Binary logistic regression results of circulating markers of inflammation by Long COVID symptom clusters with and without adjusting for CMV IgG results.

| Variables in Regression | Long COVID<br>OR (CI) <sup>a</sup> | Long COVID >5 Sx<br>OR (CI) | Fatigue<br>OR (CI)       | Neurocognitive Sx<br>OR (CI) | Cardiopulmonary Sx<br>OR (CI) | Gastrointestinal Sx<br>OR (CI) |
|-------------------------|------------------------------------|-----------------------------|--------------------------|------------------------------|-------------------------------|--------------------------------|
| NF-L                    | 1.39 (0.79-2.45)                   | 1.09 (0.54-2.22)            | 1.19 (0.71-2.01)         | 1.33 (0.8-2.2)               | 1.11 (0.66-1.86)              | 0.74 (0.42-1.31)               |
| NF-L + CMV IgG          | 1.4 (0.78-2.52)                    | 1.08 (0.53-2.24)            | 1.13 (0.66-1.94)         | 1.36 (0.81-2.29)             | 1.09 (0.64-1.87)              | 0.62 (0.37-1.21)               |
| GFAP                    | 0.94 (0.58-1.53) <sup>b</sup>      | 0.87 (0.49-1.52)            | 0.987 (0.61-1.56)        | 1.27 (0.81-1.98)             | 0.88 (0.55-1.41)              | 1.0 (0.61-1.64)                |
| GFAP + CMV IgG          | 1.02 (0.49-2.12) <sup>c</sup>      | 0.87 (0.49-1.52)            | 1.0 (0.62-1.59)          | 1.24 (0.79-1.95)             | 0.86 (0.53-1.38)              | 1.02 (0.62-1.68)               |
| IL-6                    | <b>2.09 (1.17-3.74)*</b>           | <b>3.19 (1.49-6.83)*</b>    | 1.51 (0.94-2.43)         | <b>1.9 (1.16-3.1)*</b>       | 1.31 (0.82-2.08)              | <b>2.11 (1.25-3.56)*</b>       |
| IL-6 + CMV IgG          | <b>2.23 (1.21-4.1)*</b>            | <b>3.33 (1.51-7.32)*</b>    | 1.44 (0.89-2.34)         | <b>2.05 (1.22-3.45)*</b>     | 1.35 (0.83-2.18)              | <b>2.03 (1.19-3.46)*</b>       |
| TNF $\alpha$            | <b>1.69 (1.04-2.76)*</b>           | <b>2.33 (1.19-4.58)*</b>    | 1.4 (0.9-2.18)           | <b>1.86 (1.19-2.91)*</b>     | 1.31 (0.85-2.03)              | <b>1.67 (1.04-2.68)*</b>       |
| TNF $\alpha$ + CMV IgG  | <b>1.77 (1.06-2.95)*</b>           | <b>2.4 (1.19-4.84)*</b>     | 1.33 (0.84-2.1)          | <b>2.04 (1.17-3.27)*</b>     | 1.37 (0.86-2.16)              | 1.59 (0.98-2.59)               |
| IFN $\gamma$            | 1.01 (0.66-1.55)                   | 0.88 (0.51-1.54)            | <b>0.63 (0.4-0.98)*</b>  | <b>0.66 (0.43-0.99)*</b>     | 1.18 (0.79-1.77)              | 0.85 (0.55-1.31)               |
| IFN $\gamma$ + CMV IgG  | 1.02 (0.66-1.55)                   | 0.88 (0.51-1.55)            | <b>0.61 (0.39-0.96)*</b> | <b>0.66 (0.43-0.995)*</b>    | 1.18 (0.79-1.77)              | 0.83 (0.53-1.29)               |
| IL-10                   | 1.33 (0.84-2.1)                    | 1.36 (0.74-2.49)            | 0.77 (0.51-1.17)         | 1.06 (0.77-1.48)             | 1.39 (0.96-2.01)              | 0.98 (0.68-1.41)               |
| IL-10 + CMV IgG         | 1.33 (0.84-2.12)                   | 1.35 (0.73-2.49)            | 0.73-0.47-1.14)          | 1.07 (0.77-1.49)             | 1.4 (0.96-2.03)               | 0.95 (0.65-1.4)                |
| IP-10                   | 1.4 (0.87-2.25)                    | 1.18 (0.67-2.05)            | 0.88 (0.57-1.35)         | 1.12 (0.74-1.68)             | 1.12 (0.74-1.72)              | 0.84 (0.53-1.32)               |
| IP-10 + CMV IgG         | 1.42 (0.86-2.34)                   | 1.17 (0.65-2.11)            | 0.81 (0.51-1.28)         | 1.13 (0.74-1.73)             | 1.11 (0.71-1.73)              | 0.75 (0.46-1.23)               |
| MCP-1                   | 1.04 (0.66-1.64)                   | 1.19 (0.65-2.16)            | 0.99 (0.64-1.54)         | 1.09 (0.72-1.65)             | 1.15 (0.75-1.79)              | 1.46 (0.9-2.36)                |
| MCP-1 + CMV IgG         | 1.05 (0.66-1.67)                   | 1.18 (0.65-2.16)            | 0.96 (0.62-1.5)          | 1.12 (0.74-1.69)             | 1.19 (0.76-1.85)              | 1.42 (0.88-2.3)                |

<sup>a</sup> Odds Ratio (OR) from  $[\text{Log}_{10}(\text{biomarker})/\text{ICR}] = \text{OR per IQR}$

<sup>b</sup> OR and 95% confidence intervals (CI) from binary logistic regression of biomarker variable alone (constant included in the model)

<sup>c</sup> OR and 95% CI from binary logistic regression of biomarker covariate adjusted for CMV IgG serostatus (constant included in the model)

IQR = interquartile range; Sx = symptoms; \* P<0.05 in binary logistic regression models
